# Supplementary material for: Identification of Functional Differences in Metabolic Networks Using Comparative Genomics and Constraint-Based Models
Source: PubMed Central journal article supplement (PMC3359066; doi:10.1371/journal.pone.0034670), 2012-04-16
Supplement: pone.0034670.s001.pdf [file pone.0034670.s001.pdf]

## (A) Before Corrections

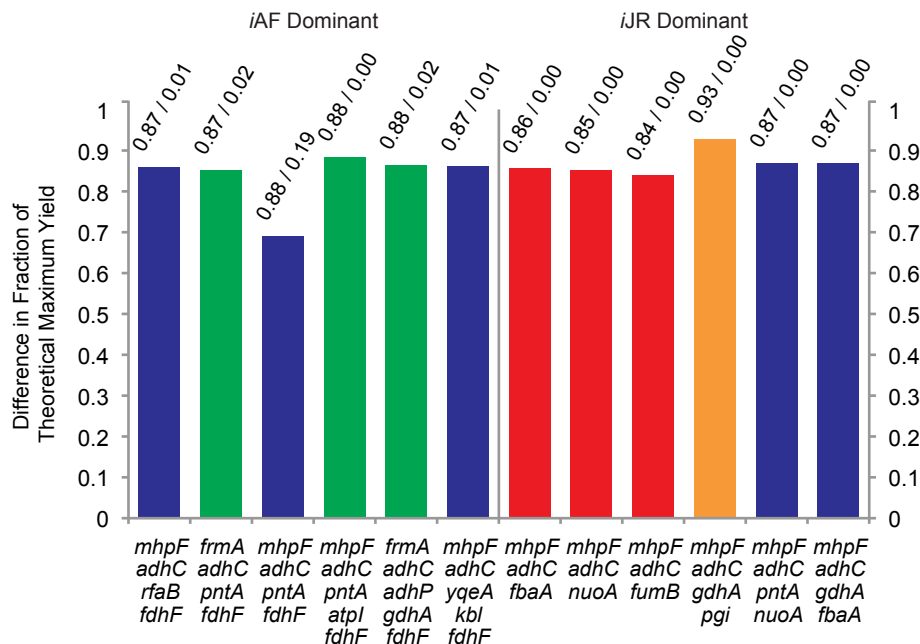

## (B) After Corrections

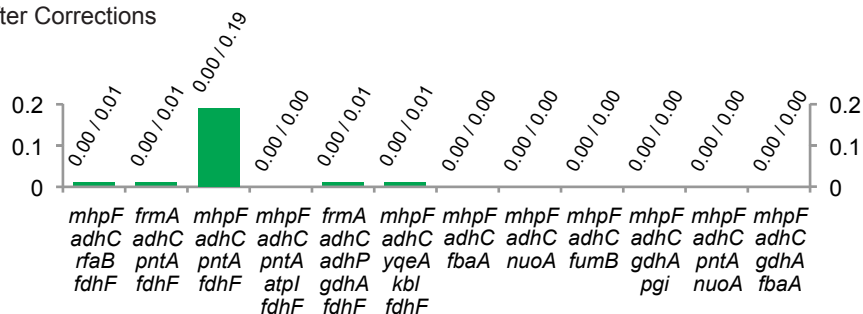

## Legend

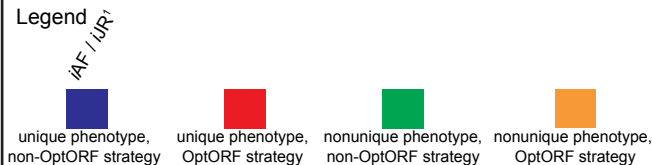

<sup>1</sup> For *iJR*-dominant strategies, the order is reversed.
