# Supplementary material for: Identification of Functional Differences in Metabolic Networks Using Comparative Genomics and Constraint-Based Models
Source: PubMed Central journal article supplement (PMC3359066; doi:10.1371/journal.pone.0034670), 2012-04-16
Supplement: pone.0034670.s002.pdf [file pone.0034670.s002.pdf]

## (A) Before Corrections

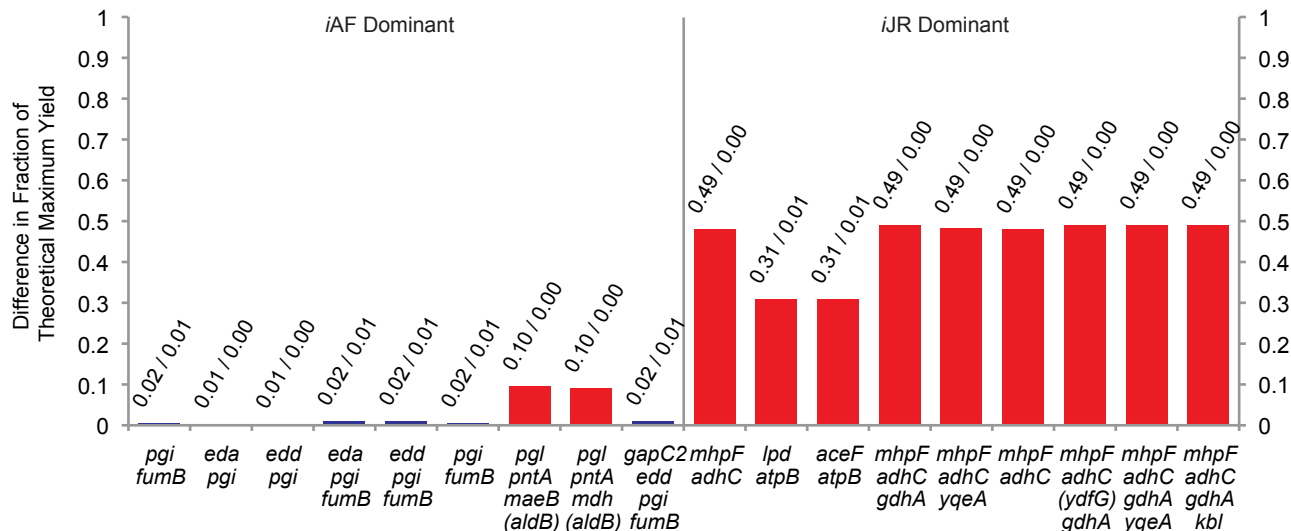

## (B) After Corrections

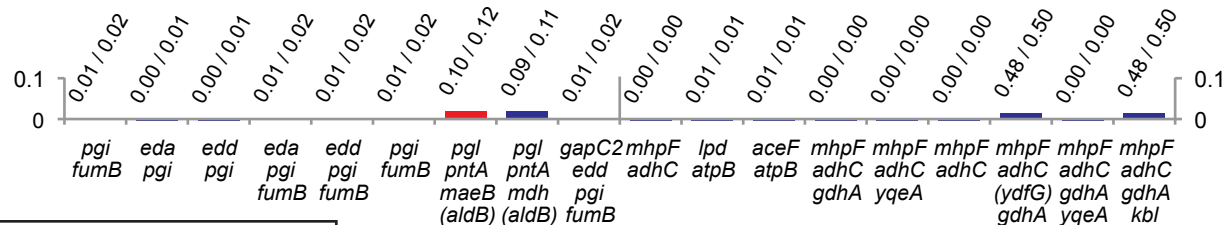

## Legend

iAF / iJR<sup>1</sup>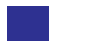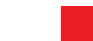

unique phenotype, non-OptORF strategy      unique phenotype, OptORF strategy

<sup>1</sup> For iJR-dominant strategies, the order is reversed.
