# Supplementary material for: Identification of Functional Differences in Metabolic Networks Using Comparative Genomics and Constraint-Based Models
Source: PubMed Central journal article supplement (PMC3359066; doi:10.1371/journal.pone.0034670), 2012-04-16

(A) Role of Succinate Transport in *iAF* Dominant Ethanol Production.  
Deletions: *ycgT*, dihydroxyacetone phosphotransferase  
*pykA*, pyruvate kinase

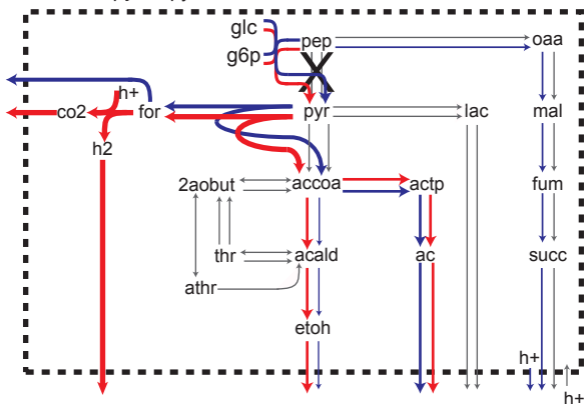

(B) Role of Hydrogen Transport in *iJR* Dominant Ethanol Production.  
Deletions: *atpB*, ATP synthase

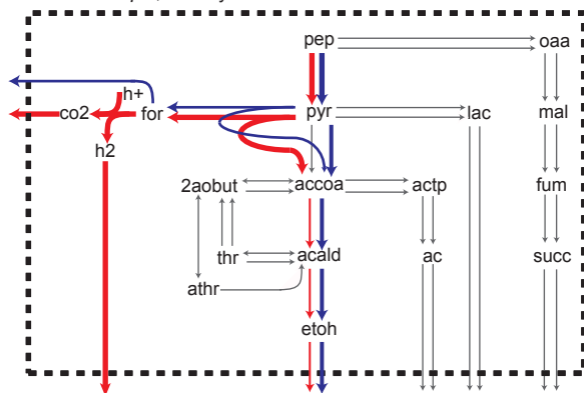

(C) Role of Hexokinase in *iJR* Dominant Ethanol Production.  
Deletions: *edd*, 6-phosphogluconate dehydratase  
*pgi*, glucose-6-phosphate isomerase

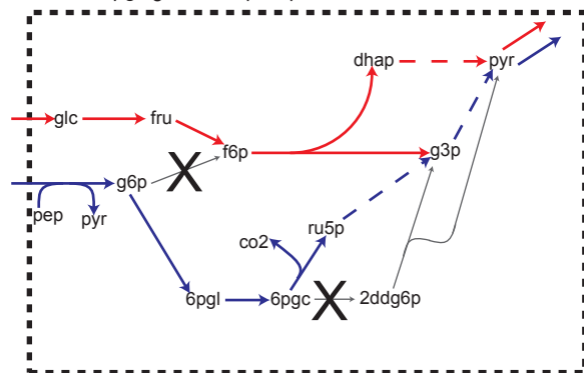

Supplement: pone.0034670.s003.pdf [file pone.0034670.s003.pdf]
